# Supplementary material for: Chitosan based in situ and ex situ magnetic iron oxide nanoparticles for rapid endotoxin removal from protein solutions
Source: Royal Society of Chemistry journal article supplement (doi:10.1039/c8qm00668g), 2019-01-01
Supplement: c8qm00668g1.pdf [file c8qm00668g1.pdf]

## Supplementary Information

# Chitosan Based *In-Situ* and *Ex-Situ* Magnetic Iron Oxide Nanoparticles for Rapid Endotoxin Removal from Protein Solutions

Achyut Konwar,<sup>†</sup> Devasish Chowdhury,<sup>†</sup> and Abhijit Dan<sup>\*,†,‡</sup>

<sup>†</sup>Physical Sciences Division, Institute of Advanced Study in Science and Technology, Paschim Boragaon, Garchuk, Guwahati – 781035, India

<sup>‡</sup>Department of Chemistry & Centre for Advanced Studies in Chemistry, Panjab University – Chandigarh, Sector – 14, Chandigarh – 160014, India

**Table S1:** XRD analysis data of the chitosan based iron oxide nanoparticles prepared by *in-situ* (In-3) and *ex-situ* (Ex 20:1, Ex 10:1, Ex 5:1) methods. Note: CH = Dry chitosan, CH-Gel = Glutaraldehyde cross-linked chitosan hydrogel.

### Bare MNP

| Sl No. | 2 $\theta$ | d-spacing | intensity | % intensity |
|--------|------------|-----------|-----------|-------------|
| 1      | 30.176     | 2.9593    | 182       | 23          |
| 2      | 35.524     | 2.5250    | 798       | 100         |
| 3      | 43.170     | 2.0939    | 120       | 15          |
| 4      | 53.694     | 1.7057    | 70        | 9           |
| 5      | 57.324     | 1.6060    | 242       | 30          |
| 6      | 62.865     | 1.4771    | 365       | 46          |

**In-3**

| Sl No. | 2 $\theta$ | d-spacing | intensity | % intensity |
|--------|------------|-----------|-----------|-------------|
| 1      | 30.369     | 2.9409    | 190       | 34          |
| 2      | 35.717     | 2.5118    | 555       | 100         |
| 3      | 43.363     | 2.0850    | 99        | 18          |
| 4      | 53.694     | 1.7057    | 28        | 5           |
| 5      | 57.324     | 1.6060    | 164       | 30          |
| 6      | 62.865     | 1.4771    | 278       | 50          |

**Ex 20:1**

| Sl No. | 2 $\theta$ | d-spacing | intensity | % intensity |
|--------|------------|-----------|-----------|-------------|
| 1      | 30.369     | 2.9409    | 62        | 14          |
| 2      | 35.717     | 2.5118    | 454       | 100         |
| 3      | 43.170     | 2.0939    | 58        | 13          |
| 4      | 53.866     | 1.7006    | 37        | 8           |
| 5      | 57.131     | 1.6110    | 194       | 43          |
| 6      | 62.865     | 1.4771    | 266       | 58          |

**Ex 10:1**

| Sl No. | 2 $\theta$ | d-spacing | intensity | %   |
|--------|------------|-----------|-----------|-----|
| 1      | 30.176     | 2.9593    | 202       | 30  |
| 2      | 35.524     | 2.5250    | 682       | 100 |
| 3      | 43.170     | 2.0939    | 128       | 19  |
| 4      | 53.694     | 1.7057    | 66        | 10  |
| 5      | 57.216     | 1.6088    | 236       | 35  |
| 6      | 62.672     | 1.4812    | 361       | 53  |

**EX 5:1**

| Sl No. | 2 $\theta$ | d-spacing | Intensity | % Intensity |
|--------|------------|-----------|-----------|-------------|
| 1      | 29.983     | 2.9779    | 46        | 13          |
| 2      | 35.331     | 2.5384    | 359       | 100         |
| 3      | 43.170     | 2.0939    | 22        | 6           |
| 4      | 53.501     | 1.7114    | 7.5       | 2           |
| 5      | 57.324     | 1.6060    | 148       | 41          |
| 6      | 63.058     | 1.4730    | 235       | 65          |

### Determination of Size from Scherrer's Equation

$$L = \frac{K\lambda}{B \cos\theta}$$

L = Size of the nanocrystal

B = FWHM (Full width at half maxima)

$\theta$  = Angle

K = Scherrer's constant

$\lambda$  = Wavelength

**Table S2.** Average particle size of the materials obtained from Scherrer's Equation

| <b>Sample name</b> | <b>Size</b> |
|--------------------|-------------|
| Bare MNP           | 15.7        |
| In-3               | 13.4        |
| Ex 20:1            | 17          |
| Ex 10:1            | 17          |

**Table S3.** Coercivity and saturation magnetization values of different magnetic nanoparticle products.

| <b>Sample name</b> | <b>Coercivity</b> | <b>Magnetization</b> |
|--------------------|-------------------|----------------------|
| MNP                | 24.949 G          | 54.154 emu/g         |
| In-3               | 19.947 G          | 22.924 emu/g         |
| Ex 20:1            | 24.278 G          | 40.531 emu/g         |
| Ex 10:1            | 20.366 G          | 50.486 emu/g         |
